# Supplementary material
Source: MDPI journal article supplement (https://www.mdpi.com/2073-4441/14/21/3452)
Supplement: s1 [file s1 › water-1961155-supplementary.pdf]

## Supplementary Materials

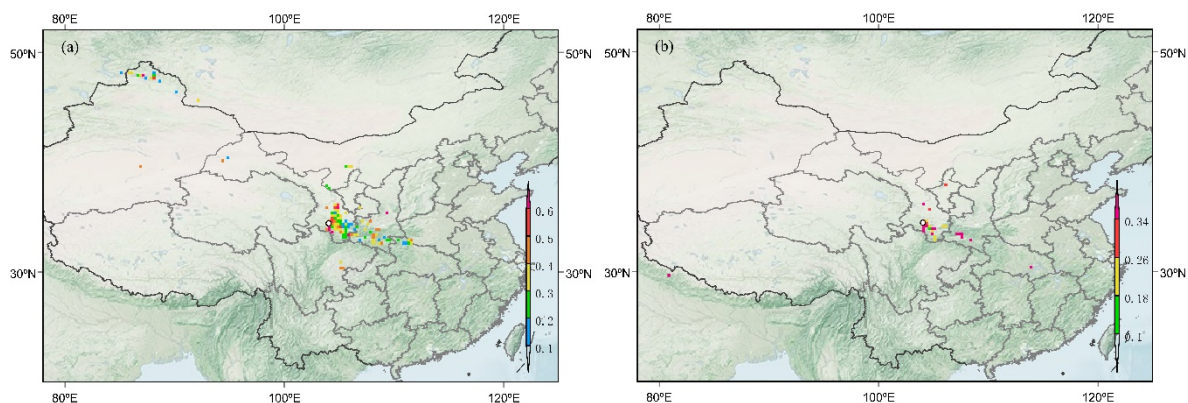

**Figure S1.** Potential evaporation source areas at Minxian Station in October and April (a) and from November to March (b).

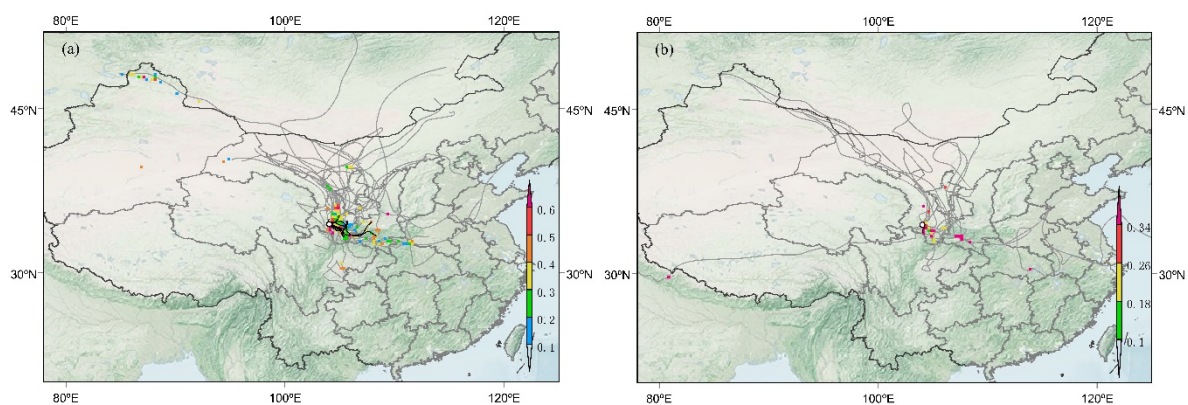

**Figure S2.** Advective transported water vapor (grey) and locally recirculated water vapor (black) in October and April (a) and from November to March (b) at Minxian Station.
